# Supplementary material for: Magnetite nanoparticles coated with surfactant Sylgard 309 and its application as an adsorbent for paraben extraction from pharmaceutical and water samples
Source: Royal Society of Chemistry journal article supplement (doi:10.1039/c9ay01147a), 2019-01-01
Supplement: c9ay01147a1.pdf [file c9ay01147a1.pdf]

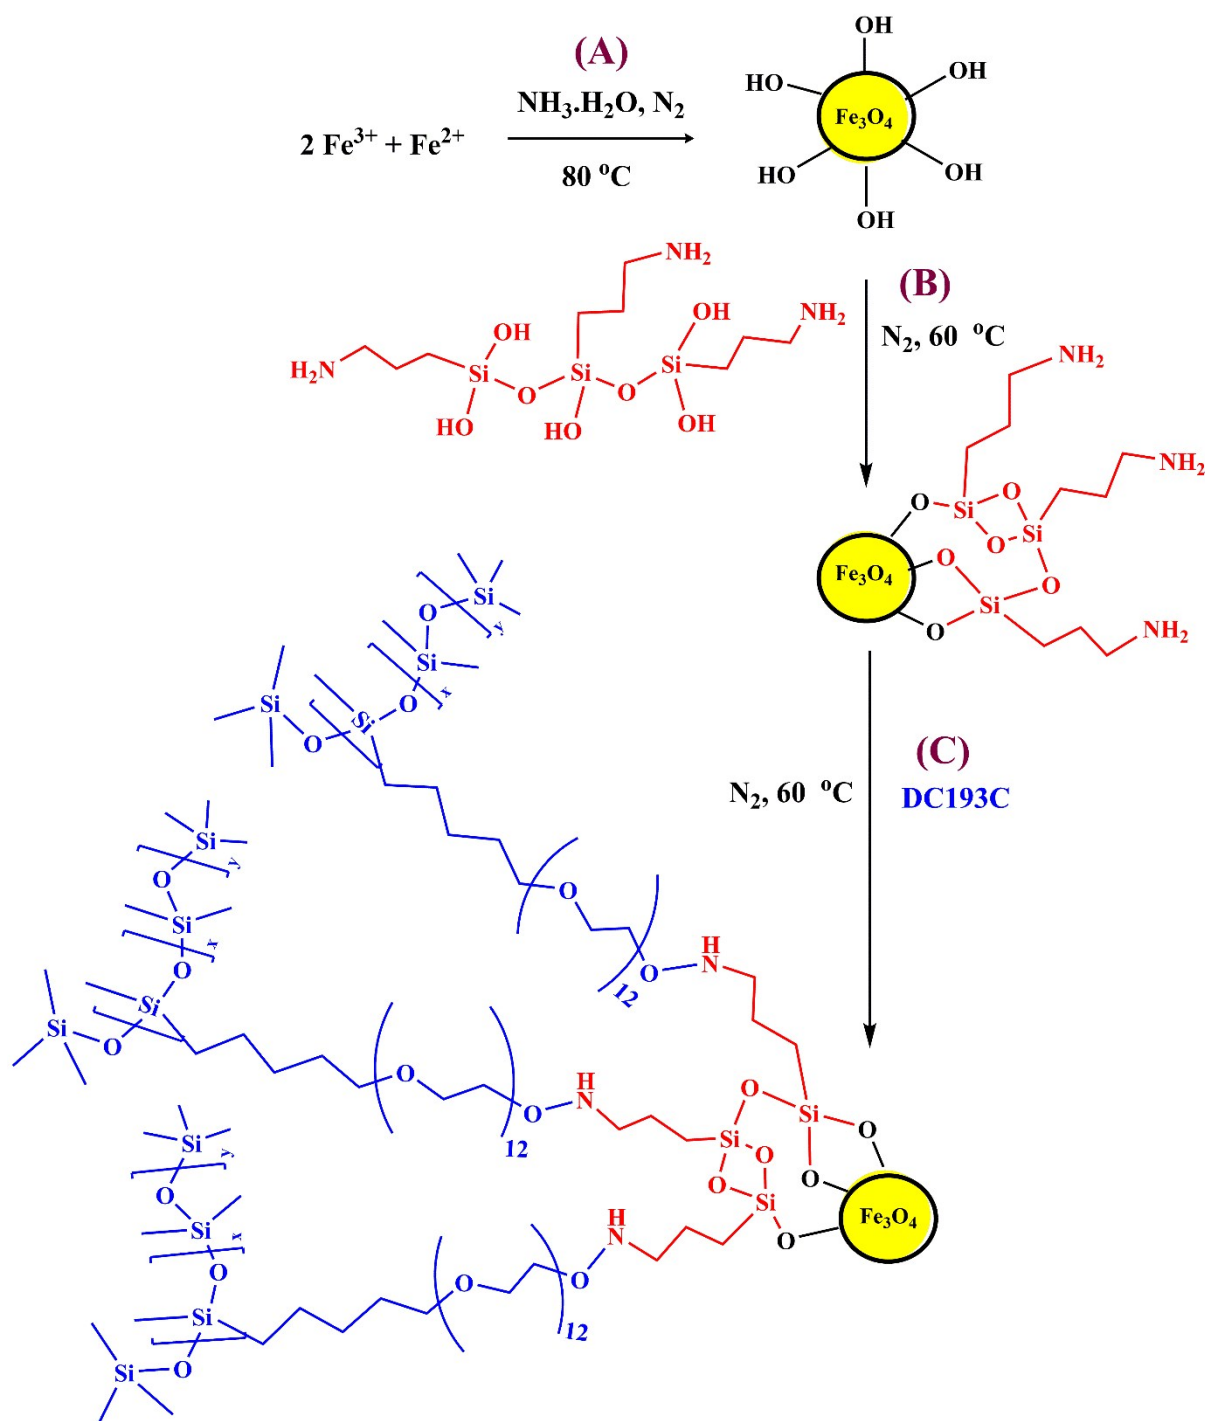

Appendix 1. Preparation of MNP@DC193C

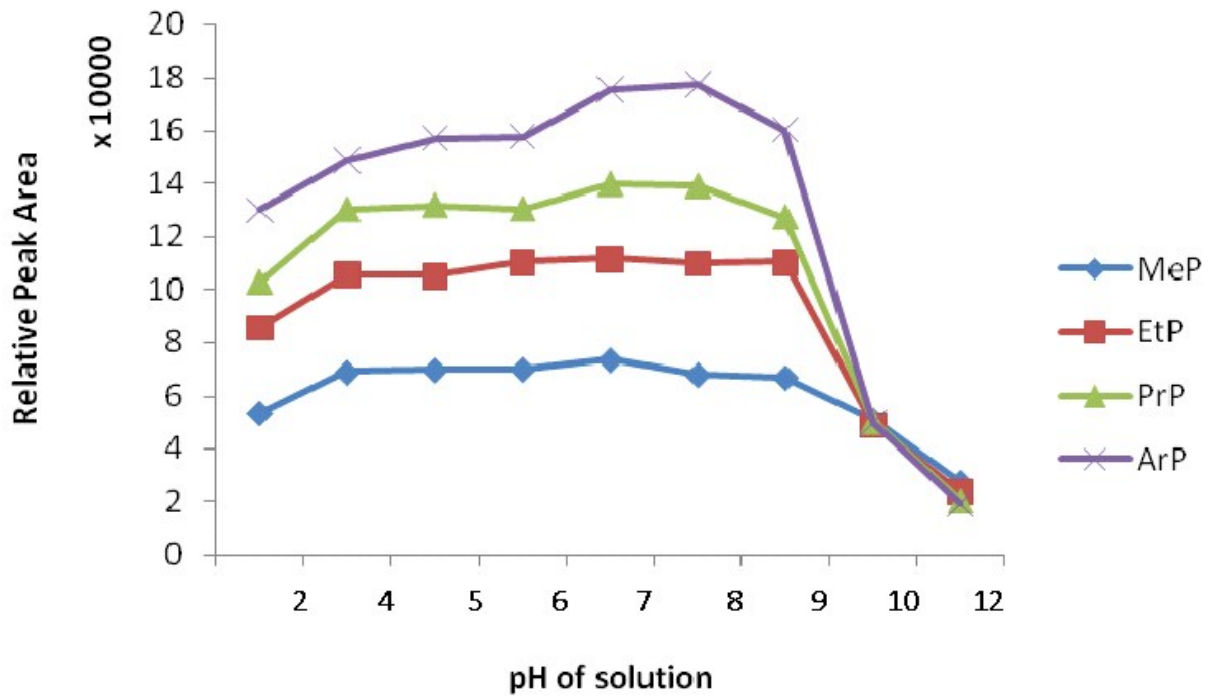

**Appendix 2.** Effect of the solution pH on the extraction efficiency of parabens

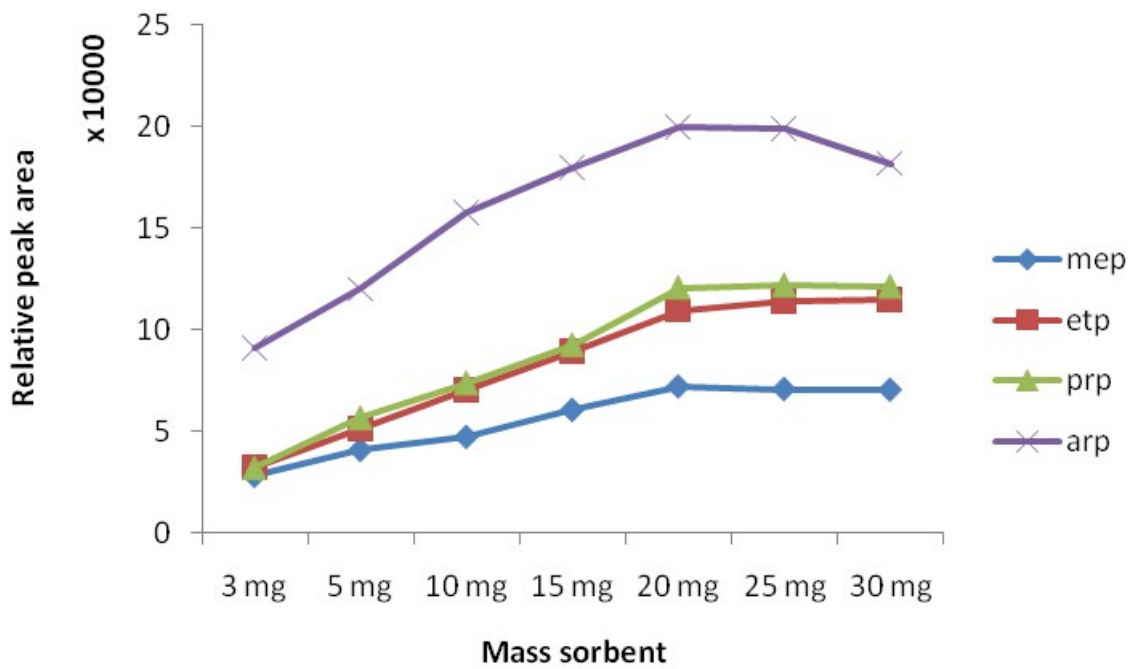

**Appendix 3.** Effect of the amounts of sorbent on the extraction efficiency of parabens

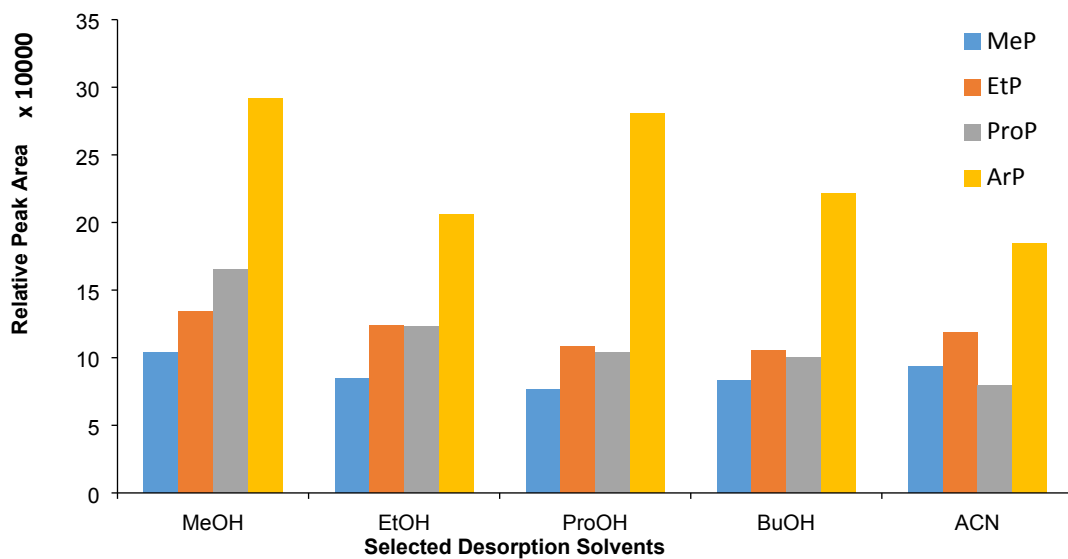

**Appendix 4.** The effect of desorption solvents on the extraction efficiency of parabens

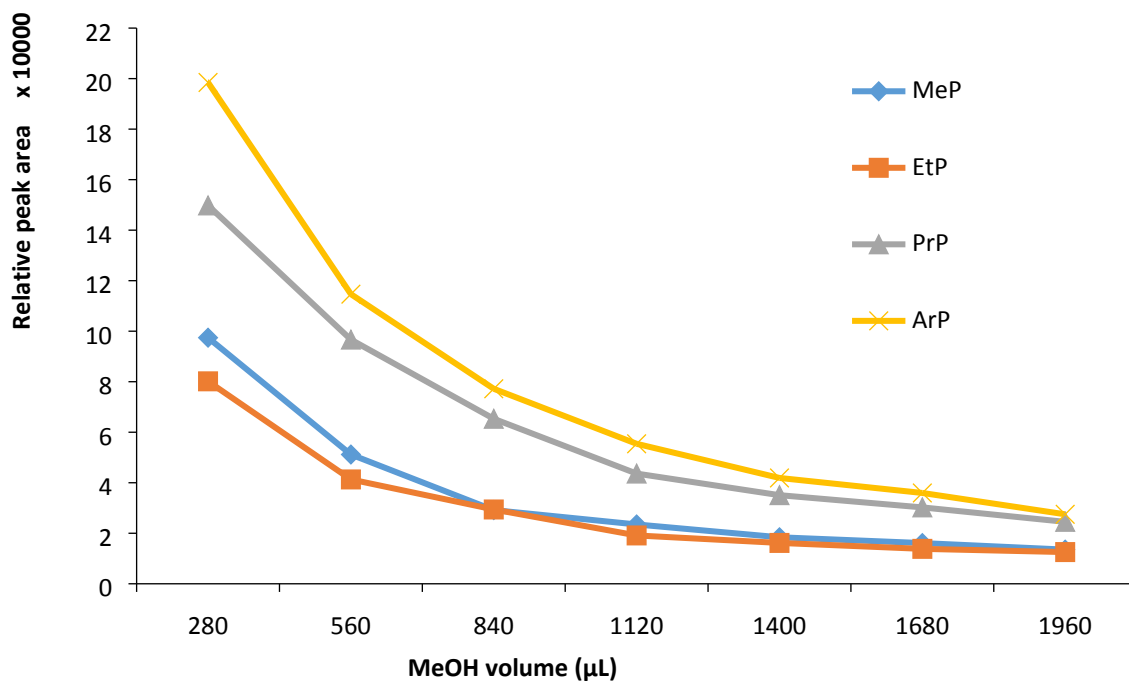

**Appendix 5.** The effect of volume of methanol on the extraction efficiency of parabens

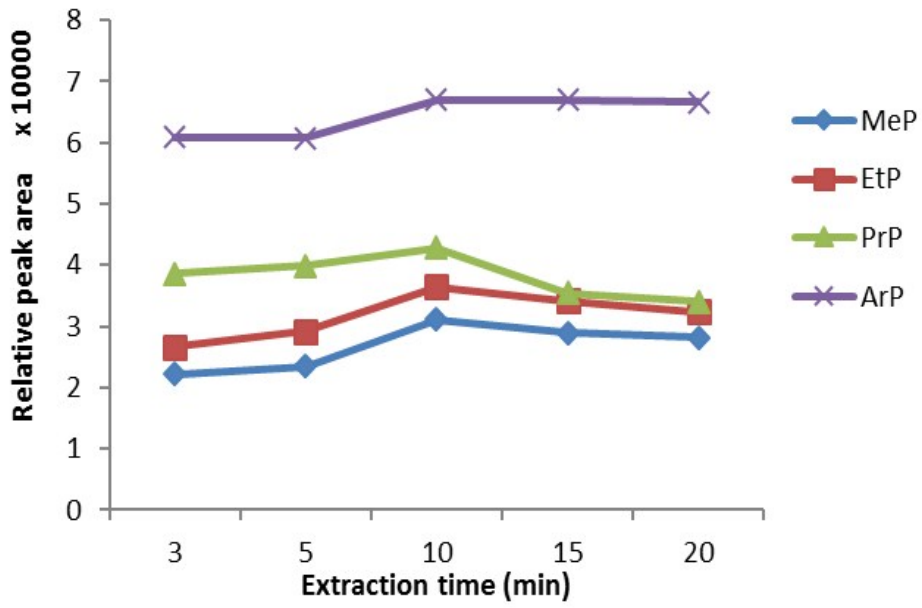

**Appendix 6.** Effect of the extraction time on the extraction efficiency of parabens

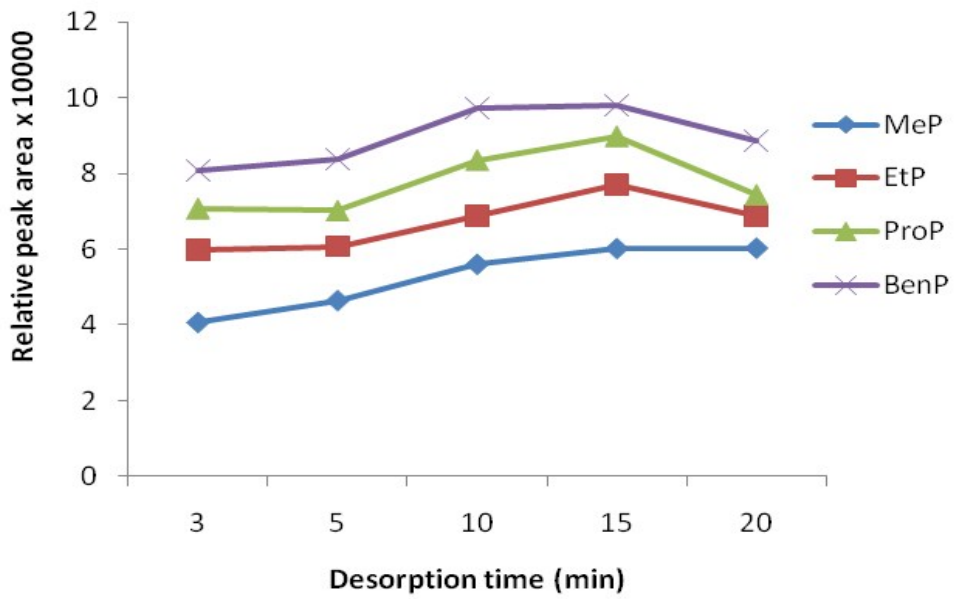

**Appendix 7.** Effect of desorption time on the extraction efficiency of parabens

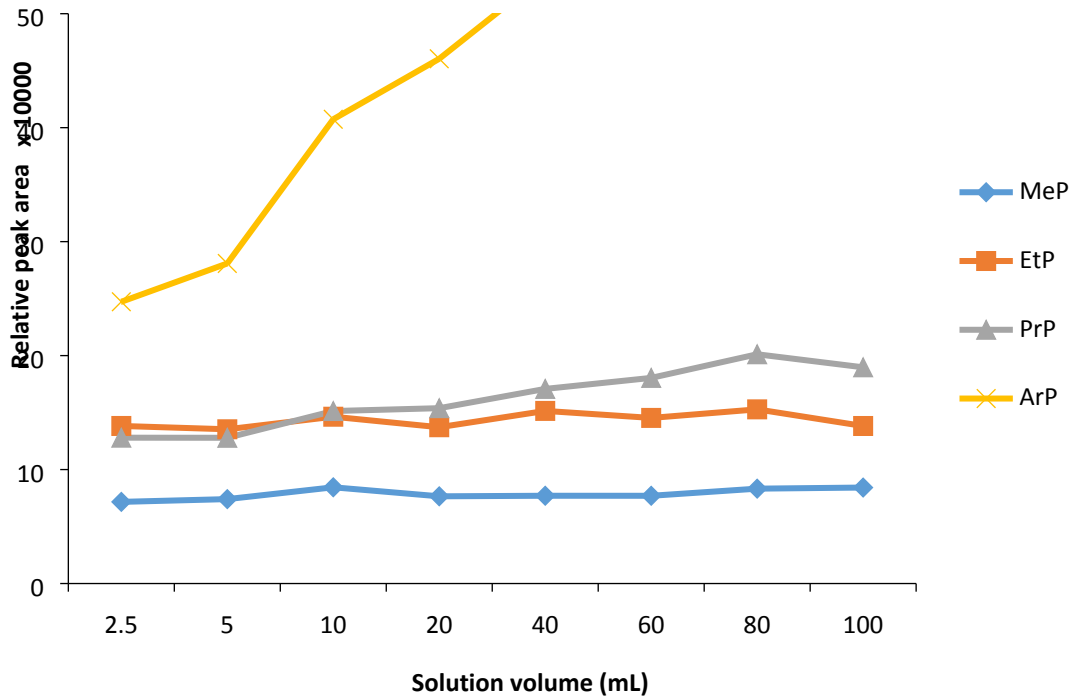

**Appendix 8.** The effect of sample volume on the extraction efficiency of parabens

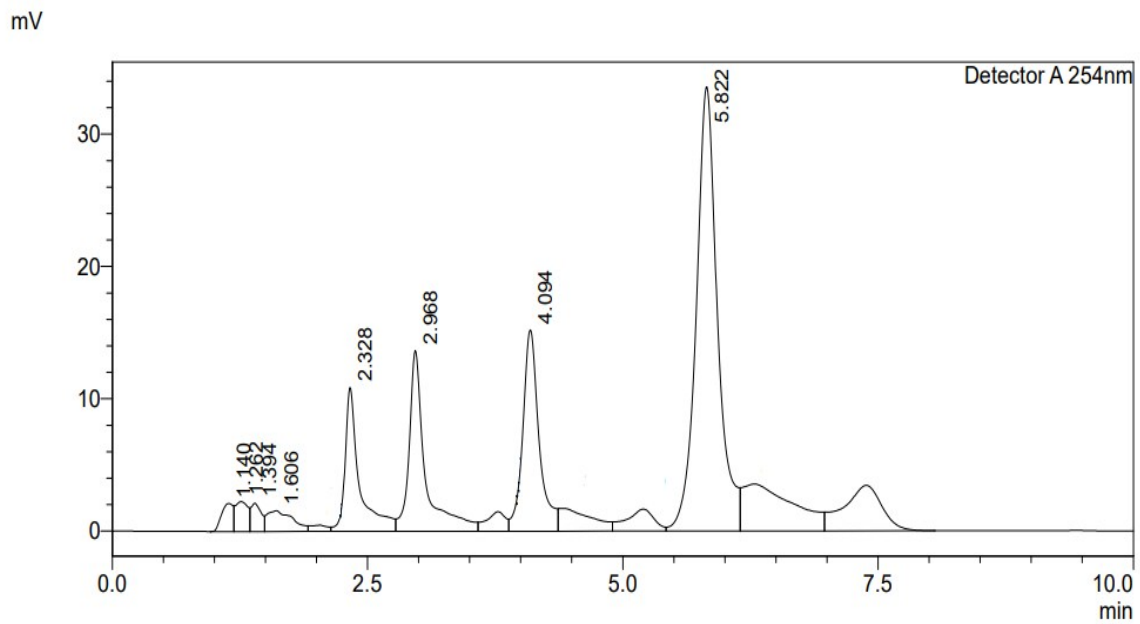

**Appendix 9.** HPLC-UV chromatogram of the paraben samples extracted from river water sample (2.328 min = MeP, 2.968 min = EtP, 4.094 min = PrP, 5.822 min = ArP)
